1

2

3 **Chronic Stability of Single-Channel Neurophysiological Correlates of Gross and Fine**

4 **Reaching Movements in the Rat**

5

6

7 David T. Bundy<sup>1</sup>, David J Guggenmos<sup>1</sup>, Maxwell D Murphy<sup>2</sup>, Randolph J. Nudo<sup>1,3\*</sup>

8

9

10 <sup>1</sup> Department of Physical Medicine and Rehabilitation, University of Kansas Medical Center,

11 Kansas City, KS

12 <sup>2</sup> Bioengineering Graduate Program, University of Kansas, Lawrence, KS

13 <sup>3</sup> Landon Center on Aging, University of Kansas Medical Center, Kansas City, KS

14

15 \* Corresponding Author

16 Email: [rjnudo@kumc.edu](mailto:rjnudo@kumc.edu) (RJN)

17 **Abstract**

18 Following injury to motor cortex, reorganization occurs throughout spared brain regions and is  
19 thought to underlie motor recovery. Unfortunately, the standard neurophysiological and  
20 neuroanatomical measures of post-lesion plasticity are only indirectly related to observed  
21 changes in motor execution. While substantial task-related neural activity has been observed  
22 during motor tasks in rodent primary motor cortex and premotor cortex, the long-term stability of  
23 these responses in healthy rats is uncertain, limiting the interpretability of longitudinal changes in  
24 the specific patterns of neural activity during motor recovery following injury. This study  
25 examined the stability of task-related neural activity associated with execution of reaching  
26 movements in healthy rodents. Rats were trained to perform a novel reaching task combining a  
27 ‘gross’ lever press and a ‘fine’ pellet retrieval. In each animal, two chronic microelectrode arrays  
28 were implanted in motor cortex spanning the caudal forelimb area (rodent primary motor cortex)  
29 and the rostral forelimb area (rodent premotor cortex). We recorded multiunit spiking and local  
30 field potential activity from 10 days to 7-10 weeks post-implantation to characterize the patterns  
31 of neural activity observed during each task component and analyzed the consistency of channel-  
32 specific task-related neural activity. Task-related changes in neural activity were observed on the  
33 majority of channels. While the task-related changes in multi-unit spiking and local field  
34 potential spectral power were consistent over several weeks, spectral power changes were more  
35 stable, despite the trade-off of decreased spatial and temporal resolution. These results show that  
36 rodent primary and premotor cortex are both involved in reaching movements with stable  
37 patterns of task-related activity across time, establishing the relevance of the rodent for future  
38 studies designed to examine changes in task-related neural activity during recovery from focal  
39 cortical lesions.

## 40 **1. Introduction**

41 An important challenge in neuroscience is determining how the brain controls skilled  
42 forelimb movements, a topic that has important implications for motor recovery following brain  
43 injuries as well as the development of neuroprosthetic systems. Along with non-human primates,  
44 rodents are valuable models for examining the neurophysiological basis of motor control. In  
45 particular, rodents can learn to perform a wide variety of motor tasks, including: lever press/pull  
46 movements with complex timing [1], 2D center-out joystick movements [2], single-pellet reach-  
47 to-grasp food retrievals [3, 4], and even control of brain-computer interface systems with neural  
48 activity recorded from their motor cortex [5, 6]. Because of their ability to learn complex and  
49 flexible motor behaviors, rodent species have become valuable models for studies of motor  
50 control, neural plasticity during motor learning, and neural plasticity during recovery from a  
51 focal cortical injury [1, 7-11].

52 In humans and non-human primates, complex volitional movement is a result of the  
53 output and coordination of activity in several motor areas within the cortex. While not as  
54 extensive as the primate motor system, the wide range of motor behaviors examined in rodents is  
55 likely facilitated by the presence of multiple differentiated motor areas within the rodent motor  
56 cortex. The rodent motor cortex includes two distinct and interconnected areas in which forelimb  
57 movements can be elicited with intracortical microstimulation (ICMS) and which both have  
58 direct projections to the spinal cord: the caudal forelimb area (CFA) and the rostral forelimb area  
59 (RFA) [12, 13]. Based upon the sensory response properties and overall distribution of afferent  
60 and efferent fiber connections, it is thought that CFA is homologous to the primate primary  
61 motor cortex while RFA shows similarities to the premotor cortices and supplementary motor  
62 areas (SMA) [13, 14]. While CFA and RFA are functionally distinct, both demonstrate

63 substantial task-related neural activity during the performance of a reaching task [7]. In part, this  
64 may be due to the dense reciprocal connectivity between the two regions [13], which depending  
65 on the relative timing of excitation in each area, allows RFA and CFA to modify the output from  
66 the other area [15].

67 In addition to contributing to the ability of rodents to perform complex motor behaviors, the  
68 presence of multiple distinct forelimb motor areas has important implications for studies  
69 examining neural plasticity in secondary motor regions during recovery from a cortical injury,  
70 such as stroke or traumatic brain injury. Following a lesion to CFA, rehabilitative training  
71 expands motor maps in RFA, suggesting that RFA plays some role in motor recovery [10].  
72 However, the specific changes in the roles of CFA and RFA in controlling motor movements  
73 after a cortical injury, and the relevance of these changes to motor recovery, remain unclear.  
74 While examining task-related neural activity at different stages of motor recovery may help  
75 explain the observed anatomical and motor map changes during behavioral recovery, there are  
76 several considerations that need to be addressed prior to examining the specific correlates  
77 between changes in task-related patterns of neural activity and motor recovery. First, while  
78 single-pellet retrieval tasks involving reach-to-grasp movements are sensitive in measuring  
79 motor recovery [9, 10, 16, 17], more substantial lesion models can induce significant and  
80 persistent deficits limiting successful task performance for extended periods of time [9].  
81 Therefore, a behavioral task with graded levels of difficulty will be required to assess the neural  
82 correlates of motor recovery across the full time course of motor recovery. Secondly, while  
83 previous studies have shown that chronic neurophysiological recordings can be acquired and  
84 used for decoding motor parameters and controlling brain-computer interface systems [5, 6, 11],

85 the stability of the relationship between neural activity and motor movements at the level of  
86 individual channels is uncertain in rodent models.

87 This study addresses these limitations through a novel automated complex reaching task  
88 combining a ‘gross’ lever press with a ‘fine’ single pellet retrieval within a single trial. By  
89 combining these two components into a single task, it is possible to examine motor activity in a  
90 single animal while modulating the task requirements in terms of the level of fine motor control  
91 of the distal forepaw required to successfully complete the task. Additionally, we examined the  
92 stability of task-related neural activity over 7-10 weeks. Each task component was associated  
93 with robust task-related neural activity showing that both RFA and CFA are involved in  
94 controlling reaching movements. Furthermore, both multi-unit activity and local-field potentials  
95 were stable over periods of several weeks showing that these features can be used in future  
96 studies examining the longitudinal changes in movement-related neural activity during recovery  
97 from a cortical injury.

98

## 99 **2. Materials and Methods**

100 All procedures were approved by the University of Kansas Medical Center Institutional  
101 Animal Care and Use Committee in compliance with *The Guide for the Care and Use of*  
102 *Laboratory Animals* (Eighth Edition, The National Academies Press, 2011). To examine the  
103 neural correlates of gross and fine reaching movements, five Long-Evans rats (*Rattus*  
104 *norvegicus*) were trained to perform a novel complex reaching task utilizing a custom-designed  
105 automated behavior box while neural recordings were made from RFA and CFA.

### 106 **2.1 Custom Behavior Box**

107           A custom automated behavior box was developed that combined a lever press and skilled  
108 pellet retrieval into a single trial (Figure 1). The behavior box was constructed from acrylic  
109 sheets (12" x 12" x 18" tall, 1/4" thickness). Each box had 15 mm wide vertical slits cut at 30 mm  
110 from the edge of the sides of both the front and back panels. A lever with an operating force of  
111 20 g was placed directly behind each slit in the back panel with the paddle of the lever centered  
112 in the middle of the slit at a height of 28 mm, 23 mm behind the inside edge of the box. The  
113 position of the lever could be adjusted, allowing the lever to pass through the slit for temporary  
114 placement inside of the box to aid in the initial shaping of behavior. A shelf was placed spanning  
115 the entire width of the front of the box at a height of 30 mm. In front of the vertical slit, this shelf  
116 began 16 mm outside of the inner edge of the box and extended to 48 mm in front of the inner  
117 edge of the box, leaving a gap between the outer edge of the box and the front edge of the shelf.  
118 A depression (4 mm diameter, 1 mm depth) was made on the shelf 24 mm outside of the inside  
119 edge of the box and aligned to the inside edge of the vertical slit to ensure the consistent position  
120 of the food pellet in each trial. An acrylic door was placed in front of each slit in the front panel  
121 and was controlled by a linear actuator (Actuonix, Victoria, BC), controlling access to the shelf  
122 at the front of the box. Two infrared beam break sensors provided feedback regarding the  
123 position of the forepaw to aid in segmenting rodent behavior and switching between task periods.  
124 One infrared beam was placed across the front of the box and a second infrared beam was  
125 aligned vertically through the pellet location. Levers at the back corners of the box were coupled  
126 with the door at the diagonally opposite corner, forcing rats to use the same forepaw for each  
127 task component. By aligning the height and distance of the lever at the back of the box with the  
128 pellet tray at the front of the box, both the lever press and pellet retrieval required similar  
129 ballistic reaching movements with differing requirements for fine movements of the distal

130 forepaw and sensorimotor integration. Task transitions were controlled by an Arduino  
131 microcontroller (Arduino Uno, Arduino, Ivrea, Italy) run by a custom-made MATLAB (Version  
132 R2017a, MathWorks, Natick, MA) executable function. A webcam was attached to the side wall,  
133 perpendicular to the front of the box, and aligned to image across the length of the shelf. Video  
134 from the webcam was acquired by the MATLAB executable code at 25 fps to capture reaches to  
135 the pellet tray and to control pellet dispensing. The webcam could be positioned at either side of  
136 the box to enable testing rats with either a right or left forepaw preference. Two pellet dispensers  
137 (Med Associates, Inc., Fairfax, VT) were used to dispense pellets to either side of the pellet  
138 shelf. Finally, an LED light was used to allow us to synchronize neural activity, behavioral  
139 performance, and videos recorded from additional external video camera.

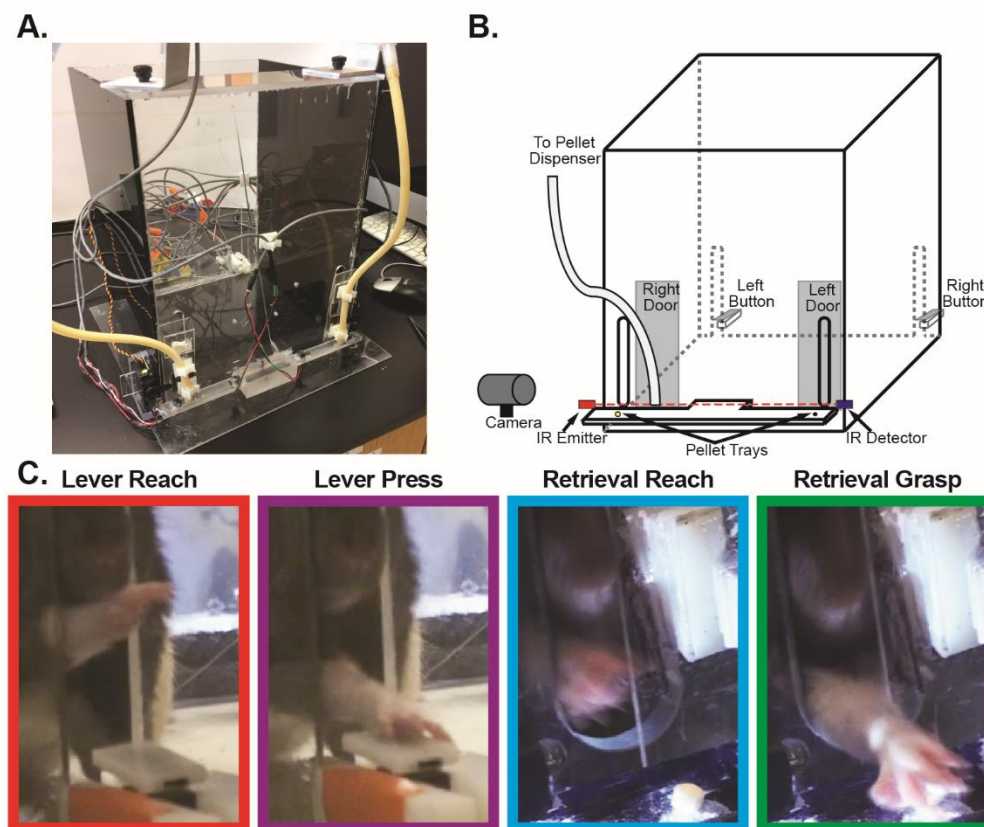

140

141 **Figure 1. Complex Reaching Task.** To evaluate the neurophysiological correlates of both gross and fine  
142 reaching movements within individual animals, we designed a novel, automated behavior box (**A**). **B**. At  
143 the beginning of each trial rats were required to use their preferred forearm to depress a lever placed

144 outside an opening at the back corner of the box, causing a door at the front of the box in the corner  
145 diagonally opposite from the lever to open, providing access to a food pellet placed on a ledge outside the  
146 box. After transitioning to the door, rats reached through an opening to grasp and retrieve the food pellet  
147 reward. After detecting an attempt to retrieve the pellet via an infrared beam across the front of the box,  
148 the door was automatically closed, preventing repeated retrieval attempts. **C.** To examine the  
149 neurophysiological correlates of task performance, video recordings were used to identify the time points  
150 for the reach-to-button onset, button press, reach-to-pellet onset, and pellet grasp onset within each trial.  
151

## 152 ***2.2 Task Structure***

153         Prior to the beginning of each trial, both doors were closed, and a pellet was dispensed to  
154 the side of the pellet shelf corresponding to the rat's preferred forelimb for pellet retrieval.  
155 Initially, rats were required to reach through the back of the box and depress the lever on the side  
156 of the box corresponding to their preferred forelimb. Upon depressing the lever, the door at the  
157 slit diagonally opposite the lever was opened, providing access to the previously dispensed food  
158 pellet on the shelf. After detecting a completed reach through the front of the box, as indicated  
159 by the infrared beam break being broken and then subsequently unbroken, the door was closed to  
160 limit secondary reaching attempts. If an attempt to retrieve the pellet was not made within 20  
161 seconds, the trial was aborted.

## 162 ***2.3 Behavioral Training***

163         Each rat went through a procedure to gradually shape their behavior to complete the full  
164 task. Initially, rats were placed in a non-automated box with a single slit cut in the center of the  
165 front panel. Rats were allowed free access to food pellets through this opening to learn to retrieve  
166 food pellets and determine forepaw preference. Pellets were placed in the center of the opening  
167 on a shelf placed across the front of the box at a height of 30 mm. Once rats began consistently  
168 retrieving pellets, their preferred forelimb was determined as the paw that was used on the  
169 majority of retrievals. Next, rats were introduced to the automated behavior box and allowed to  
170 retrieve pellets through the opening in the front of the box corresponding to their preferred



171 forepaw. The door was closed after each retrieval attempt to familiarize rats with the door  
172 mechanism. The shelf in the automated behavior box had a gap between the edge of the shelf and  
173 the outer edge of the box which reinforced the requirement that the rats fully grasp each pellet,  
174 and not retrieve pellets by simply dragging them into the box. After successfully retrieving at  
175 least 50% of pellets, the lever press was incorporated into the training. Initially the front edge of  
176 the lever paddle was positioned inside the box and rats were cued to interact with the lever via  
177 auditory cues and food placed near the lever. A food pellet was dropped into the box by the  
178 secondary pellet dispenser each time the lever was depressed. This immediate reward served to  
179 reinforce the lever press. After beginning to depress the lever, the lever was gradually moved to  
180 its position for the full task, 23 mm outside the inside wall of the box. Next, we paired the lever  
181 press to the pellet retrieval. After each lever press, rats were cued to cross to the opposite corner  
182 of the box using auditory cues (tapping at the front corner of the box). After beginning to  
183 combine the lever press and pellet retrieval, the secondary reward received for the initial lever  
184 press was gradually extinguished to avoid any chewing artifact during the trial period. Finally,  
185 rats were trained until they successfully retrieved at least 50% of pellets in three consecutive  
186 training sessions with 25 trials per session. While total training time was variable, most rats  
187 completed each training step in 1-2 weeks and therefore could learn to adequately perform the  
188 entire task in 5-10 weeks with 30-minute long training sessions 3-5 days per week (mean  $\pm$  SE =  
189  $33.6 \pm 2.75$  sessions). Following training, task performance was maintained with 2-3 training  
190 sessions per week until surgical procedures could be completed.

#### 191 ***2.4 Surgical Procedures***

192       Once rats achieved a threshold criterion of 50% successful retrievals on the full task in  
193 three consecutive sessions, we implanted chronic microwire electrode arrays into RFA and CFA.

194 At the time of surgery, rats were 23-35 weeks old. Rats were initially anesthetized with  
195 isoflurane followed by injections of ketamine (80-100mg/kg) intraperitoneally and xylazine (5-  
196 10 mg/kg) intramuscularly. Rats were also given a preoperative dose of penicillin (45,000 IU  
197 subcutaneously) to limit the risk of infection. For the duration of the procedure, anesthetic state  
198 was confirmed by checking for the presence of a pinch reflex and corneal reflex, and a surgical  
199 level of anesthesia was maintained with supplemental injections of ketamine intramuscularly as  
200 necessary (10-20 mg/hr). Rats were placed in a stereotaxic frame and an incision was made along  
201 the midline of the scalp and the temporalis muscle was resected. A laminectomy was performed  
202 to reduce cortical swelling during the procedure. A craniectomy was then made over the  
203 sensorimotor cortex of the hemisphere contralateral to the preferred forelimb and the dura was  
204 retracted. Two 16-channel tungsten alloy micro-wire arrays with electrode diameters of 50  $\mu\text{m}$   
205 (Tucker-Davis Technologies, Alachua, FL) were implanted in each rat. Arrays were organized in  
206 a 2x8 grid with 250  $\mu\text{m}$  spacing between electrodes and 500  $\mu\text{m}$  spacing between rows. A silver  
207 wire from the probe was attached to a 00-80 stainless steel skull screw to act as a ground. The  
208 first electrode array was implanted into RFA with the second electrode array targeted to CFA as  
209 allowed by the size and orientation of the craniectomy and the rodent-specific pattern of  
210 vasculature within the craniectomy window. In three rats, the location of CFA and RFA were  
211 confirmed using ICMS mapping procedures as described previously [9]. In the remaining two  
212 rats, stereotaxic coordinates were used for RFA (3.5 mm anterior to bregma, 2.5 mm lateral to  
213 bregma) and CFA (0.5 mm anterior to bregma, 3.5 mm lateral to bregma) [9, 10, 18]. Each  
214 electrode array was implanted to a depth of approximately 1500  $\mu\text{m}$  using a motorized  
215 micropositioner (Narishige International USA, Inc., Amityville, NY). An example ICMS map  
216 used to localize the implant locations is shown in Figure 2B. Electrode locations for all rats

217 relative to skull landmarks are plotted in Figure 2C. The electrode locations in RFA overlap  
218 considerably across rats with some variability in the location of the CFA electrode arrays due to  
219 the limitations placed by the size of the craniectomy and vasculature pattern. After inserting the  
220 electrodes, the cortex was covered with a silicone elastomer (Kwik-Cast, World Precision  
221 Instruments, Sarasota, FL), a head cap was constructed from dental acrylic *in situ*, and the scalp  
222 was sutured around the head cap. Following the surgery, rats were given penicillin (45,000 IU  
223 subcutaneously) to limit the risk of infection. Four doses of buprenorphine (0.05-0.1 mg/kg  
224 subcutaneously) and acetaminophen (80-100 mg/kg orally) were given over the next 48 hours as  
225 analgesics. All rats were allowed to recover for 10-20 days prior to beginning neurophysiological  
226 recordings.

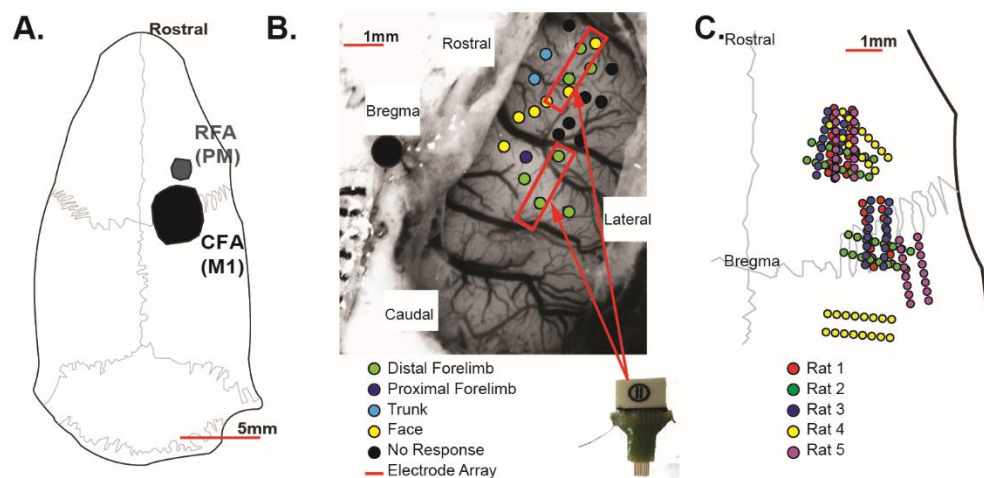

227

228 **Figure 2. Chronic Microelectrode Implants.** **A.** The rodent motor system consists of the caudal  
229 forelimb area (CFA), a homologue of M1, as well as a secondary rostral forelimb area (RFA), a  
230 homologue of premotor cortex. **B.** Sixteen-channel chronic microwire electrode arrays were implanted  
231 into each rat with one array placed in RFA and a second array implanted into CFA. Intracortical  
232 microstimulation mapping was used to confirm the locations of RFA and CFA in three rodents with  
233 stereotaxic coordinates used to determine implant locations in the remaining rats. **C.** Approximate implant  
234 locations relative to skull landmarks were determined from intraoperative photographs. With respect to  
235 stereotaxic coordinates, the location of the electrode arrays implanted into RFA was very consistent  
236 across rats with more variability in the locations of the CFA arrays due to the variable locations and  
237 orientations of blood vessels relative to the craniectomy opening.

238

239 **2.5 Neurophysiological Recordings**

240           Following the microelectrode implantation surgery, rats were given 10-20 days to recover  
241 from surgery. After the recovery period, we collected neurophysiological recordings while rats  
242 performed the reaching task in the automated behavior box. Rats performed the task 2-3 times  
243 per week for up to 10 weeks post-implant (mean  $\pm$  SE =  $14.6 \pm 0.68$  sessions). On recording  
244 days, rats were briefly anesthetized with isoflurane to ease connection of a recording headstage  
245 to each microelectrode array. The headstages, which performed amplification and digitization via  
246 an on-board amplifier chip (RHD 2132, Intan Technologies, Los Angeles, CA), were connected  
247 through a slip ring commutator (MC573, MOFLON TECHNOLOGY, Shenzhen, China) to an  
248 interface board (RHD2000, Intan Technologies, Los Angeles, CA) connected via USB to a PC  
249 computer. Neural activity was recorded at 20 kHz while rodents were in the automated behavior  
250 box performing the reaching tasks. For each session, signals were recorded while rats performed  
251 45 trials or until 45 minutes had elapsed. Occasionally, recording sessions were truncated due to  
252 the headstages becoming unplugged prior to session completion.

## 253 ***2.6 Behavioral Scoring***

254           During training sessions, time stamps of each lever press and infrared beam break were  
255 recorded by the recording amplifier as digital inputs. Videos of the reach-to-pellet were captured  
256 by a webcam at 25 fps and were synchronized to the neural recordings by the MATLAB  
257 interface. Additional video recordings were also made using an external digital video camera  
258 (Sony HDR-SR11, Sony Corporation, Tokyo, Japan) at 30 fps. The external camera was either  
259 positioned in front of the box to capture a higher resolution view of the reach to the food pellet,  
260 behind the lever to capture the lever press, or above the box to capture the rat's movement  
261 throughout the box. This orientation alternated on each recording day. External videos were  
262 synchronized by capturing an LED light in the field of view that was controlled by the MATLAB

263 interface and simultaneously recorded by the recording amplifier. Behavioral time points were  
264 co-registered by visually scoring the video recordings. As shown in Figure 1C, times for the  
265 reach to the lever, the lever press, the reach to the food pellet, and the grasp of the food pellet  
266 were identified. The times for the reach to the lever and reach to the food pellet were both  
267 defined as the frame in which the first forward movement of the paw to begin a reach was  
268 observed; the lever press was identified as the time that the lever circuit was electrically closed;  
269 and the grasp was defined as the first video frame where flexion of the digits at the end of the  
270 reach was observed. Successful trials were defined as trials in which the rat successfully  
271 retrieved the pellet on the first reach attempt to avoid potential confounding of neural activity  
272 related to an unsuccessful initial retrieval attempt followed by a successful second attempt. The  
273 reach to the food pellet and grasp were scored in each session using the webcam videos and  
274 confirmed using the external camera videos when available. While lever press time stamps could  
275 be identified in each recording, the reach to the lever was only identifiable in the subset of  
276 sessions with the external camera placed at the back of the box.

## 277 *2.7 Data Analysis*

278 Initially, raw local field potentials from all recordings were bandpass filtered from 2Hz-  
279 200Hz and visually screened to identify noisy or broken channels to exclude from all further  
280 analyses. Data was then processed to examine both multi-unit firing activity and local field  
281 potential (LFP) spectral power changes as described below.

### 282 *2.7.1 Multi-Unit Firing*

283 To determine multi-unit spiking activity, signals were re-referenced to the common  
284 average of the non-noisy channels separately for each microelectrode array. Next, signals were  
285 band pass filtered from 300-3000Hz using an 8<sup>th</sup> order elliptic filter. Potential spikes were

286 identified based upon the more stringent criteria of either a fixed threshold of -50 uV or a  
287 variable monopolar threshold based upon the background amplitude of the signal for each  
288 channel [19]. Detected spikes were automatically clustered using an automated  
289 superparamagnetic clustering algorithm [19]. Manual spike sorting was then performed to  
290 eliminate non-physiological clusters. Figure 3A shows an example of bandpass filtered data from  
291 an exemplar recording session with a number of spike profiles. Figure 3C shows several spike  
292 profiles from an exemplar channel using the same recording as the traces shown in Figure 3A.  
293 Because we expected that it would be difficult to track single unit profiles across days, spike  
294 times from each cluster on a given channel were combined to yield the multi-unit activity for a  
295 given channel. Multi-unit firing rates were estimated by convolving a Gaussian waveform of one  
296 second duration and a standard deviation of 100 ms with the multi-unit spike times. To examine  
297 changes relative to baseline, 1000 random one-second long time windows, excluding all trial  
298 windows, were identified. The firing rate during these random time periods was estimated by  
299 convolving the multi-unit spike times with a Gaussian waveform as described above and the  
300 mean random firing rate was calculated by taking the mean across all time points from each  
301 random window. Finally, the firing rate during the recording was normalized by dividing the  
302 estimated firing rate by the mean random firing rate and log-transforming. The log-transform  
303 was used to normalize the firing rate with increases relative to baseline indicated by positive  
304 values and decreases relative to baseline indicated by negative values.

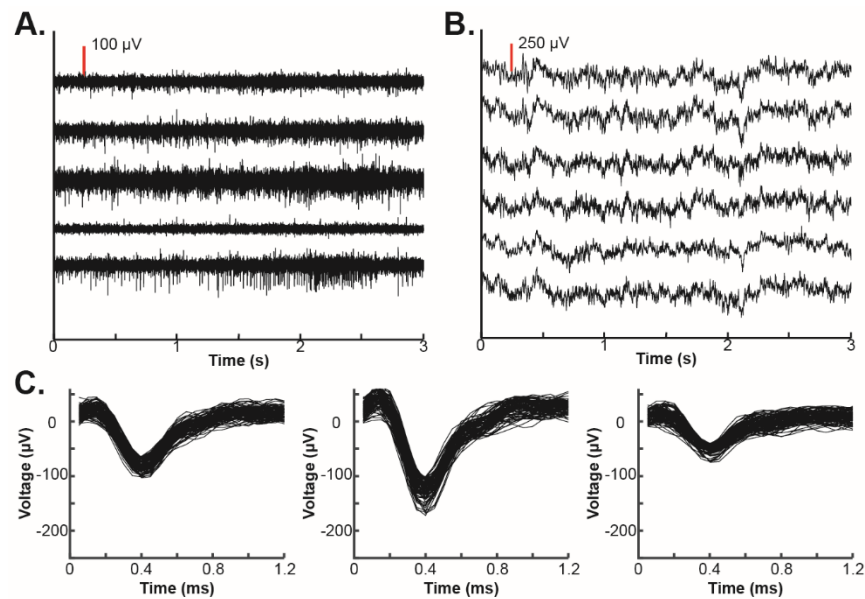

305

306 **Figure 3. Electrophysiological Analyses.** Multi-unit firing and local-field potential (LFP) activity were  
307 examined in each recording session. **A.** To examine multi-unit firing, signals were re-referenced to the  
308 common average and band-pass filtered between 300Hz and 3000Hz. Each trace shows data filtered for  
309 multi-unit activity and aligned to the same time point from randomly selected channels in a single rat. A  
310 scale of 100 µV is indicated by the vertical red line. **B.** LFP activity was visualized by filtering between  
311 5Hz and 300Hz after re-referencing to the common average. Each trace shows data filtered for LFP  
312 activity and aligned to the same time point from randomly selected channels in a single rat. A scale of 250  
313 µV is indicated by the vertical red line. **C.** To examine multi-unit firing, action potentials were detected  
314 using a superparamagnetic clustering algorithm followed by manual sorting to eliminate noisy clusters.  
315 Plots show 100 example spikes detected from 3 profiles isolated on a single channel. Following spike  
316 sorting, multi-unit activity was generated by combining all single-unit clusters from each individual  
317 channel.

### 318 2.7.2 LFP Spectral Power Estimation

319 Task-related changes in the LFP spectral power were also examined. Raw signals were  
320 low-pass filtered at 400 Hz and decimated to a sampling rate of 1000Hz. All harmonics of the  
321 60Hz power line noise below the Nyquist frequency were removed using an 8<sup>th</sup>-order Chebyshev  
322 notch filter. Signals were then re-referenced to the common average of all channels with  
323 neurophysiological signals separately for each microelectrode array. Examples of the raw LFP  
324 signals are shown in Figure 3B. The maximum entropy method, an autoregressive method of  
325 spectral estimation, was used to estimate spectral power [20]. A model order of 50 was selected

326 and spectral power was estimated in 2 Hz frequency bins with bin centers ranging from 2 Hz to  
327 200 Hz. Spectral power was calculated in 250 ms windows with shifts of 50 ms between  
328 windows to examine temporal changes. As with the multi-unit firing rate, 1000 random one-  
329 second long time windows, excluding all trial periods, were identified, and the spectral power  
330 was estimated in each window. Spectral power estimates were normalized by log-transformation  
331 and were then z-scored by subtracting the mean and dividing by the standard deviation of the  
332 frequency-specific spectral power estimated from the random time windows. Positive values  
333 indicated increases in spectral power at a given frequency relative to its baseline, and negative  
334 values indicated decreases in spectral power relative to baseline. Because the high-gamma band  
335 (70-105Hz) of the LFP signal has been found to represent localized activity that is strongly  
336 correlated with asynchronous spiking [21], the average high-gamma band power was found by  
337 averaging the z-scored spectral power for all frequency bins with centers between 70Hz and  
338 105Hz.

### 339 ***2.8 Single-Day Characterization of Task-Related Neural Activity***

340 Initially, the patterns of task-related neural activity during the two components of the task  
341 (lever press and pellet retrieval) were characterized using a single exemplar session. For the  
342 initial characterization of task-related neural activity, recordings were excluded for each rat until  
343 at least one session in which the rat performed 36 trials (80% of the daily goal) was acquired. To  
344 allow for examination of both components of the task, the next recording session with the  
345 external camera at the back of the box in which each rat performed at least 36 trials (80% of the  
346 daily goal) was used for the single-day characterization of task-related neural activity.

347 For each trial within the exemplar session, several behavioral time points were identified  
348 for further analysis. Sessions with the external camera behind the box allowed us to use the



349 external camera recordings to identify the onset of reaching movements towards the lever and the  
350 lever timing to identify the downward movement used to press the lever, while the webcam at  
351 the front of the box was used to identify the onset of reaching movements to the food pellet and  
352 the onset of grasping movements. After identifying these time points for each trial, the task-  
353 related multi-unit firing rates and spectral power were examined as described below.

354 For each task event considered, a period from 1 s before to 1 s after the event was  
355 examined, matching the time of peak activations observed in previous studies of rodent reaching  
356 tasks [7]. For the lever press, task-related neural activity recorded from each channel was aligned  
357 either to the reach onset or lever press based upon whether the greatest absolute average depth-  
358 of-modulation was found by aligning neural activity to the onset of the reach towards the lever or  
359 to the lever press itself. Because the neural activity was normalized and log-transformed, signals  
360 were normally distributed with increases in neural activity relative to baseline indicated by  
361 positive values and decreases in neural activity indicated by negative values. Therefore, the  
362 depth-of-modulation was defined as the absolute value of the task-aligned neural activity.  
363 Similarly, for the pellet retrieval, each channel was aligned to the onset of the reach or onset of  
364 the grasp based upon whether the greatest absolute depth-of modulation was found by aligning  
365 neural activity to either the onset of the reach towards the pellet or the onset of the grasping  
366 movement. For the lever press, each channel was then classified as statistically significantly  
367 modulated and reach-related, statistically significantly modulated and press-related, or not  
368 significantly modulated. Similarly, for the pellet retrieval, each channel was also classified as  
369 significantly modulated and reach-related, significantly modulated and grasp-related, or not  
370 modulated. The statistical significance of each channel and task component's classification was  
371 calculated to determine if the peak task-related neural activity was significantly different from

372 chance using an independent samples t-test comparing the distribution of task-related neural  
373 activity at the time of the peak absolute depth-of-modulation to a randomly selected distribution  
374 of neural activity. The random distribution was derived by collecting the neural activity from  
375 1000 random time points collected from outside of any trial period. A significance level of  
376  $p < 0.05$  was used to define significance with Bonferroni correction for the total number of  
377 comparisons tested across channels and task periods. Each channel with spike profiles identified  
378 was classified as described above. Each channel was separately classified based upon whether  
379 there were statistically significant increases or decreases of the high-gamma band spectral power  
380 during either the lever press or the pellet retrieval. As with the multi-unit firing, the high-gamma  
381 band was also used to give each channel two classifications: first, each channel was classified as  
382 statistically significantly modulated and reach-related, statistically significantly modulated and  
383 press-related, or not significantly modulated for the lever press, and second, each channel was  
384 classified as statistically significantly modulated and reach-related, statistically significantly  
385 modulated and grasp-related, or not significantly modulated for the pellet retrieval.

### 386 ***2.9 Chronic Stability of Task-Related Neural Activity***

387 Finally, we sought to examine the chronic stability of task-related neural activity in RFA  
388 and CFA. Because videos capturing the lever press were not captured for every recording day  
389 due to rotating the position of the external video camera, the analysis of the stability of task-  
390 related neural activity was limited to the pellet retrieval component of the task. For each channel  
391 with a statistically significant reach or grasp-related change in multi-unit firing rate in the  
392 exemplar recording session described above, trials from each recording day were aligned to the  
393 reach onset or grasp onset based upon the initial classification from the exemplar recording day.  
394 Next, the daily average multi-unit firing rate was calculated for each channel. A global average

395 time course of task-aligned multi-unit firing rate was calculated by averaging the firing rate from  
396 all trials across all recording days. Finally, for each channel and recording day, the correlation  
397 coefficient (Pearson's  $r$ ) was calculated between the global and daily averaged firing rate. The  
398 consistency of task-related high-gamma band power changes was assessed using the same  
399 procedure for all channels with statistically significant reach or grasp-related changes in high-  
400 gamma band spectral power in the exemplar session. We then compared the inter-day  
401 consistency of single-channel task-related multi-unit firing rate changes with the inter-day  
402 consistency of task-related high gamma band power changes using a Wilcoxon rank sum test  
403 comparing the distribution of correlation values for the two signal types across all rats, channels,  
404 and days.

### 405 **3. Results**

#### 406 *3.1 Rat Characteristics and Behavioral Performance*

407 All rats learned to perform the task with successful retrievals on 60-80% of trials. Table 1  
408 summarizes the overall behavioral performance of each rat. Each rat continued to perform the  
409 task with accuracies above 50% success rates, indicating that the microelectrode implantation did  
410 not impair the ability to perform the task (Exemplar Sessions: mean  $\pm$  SE = 67.4%  $\pm$  4.0%;  
411 Overall: mean  $\pm$  SE = 63.5%  $\pm$  1.4%). While these performance scores are lower than reported in  
412 previous studies of pellet retrieval in rats [9, 10, 17], the gap between the shelf and box required  
413 rats to fully lift each pellet and the door restricted repeated reaching attempts, increasing the  
414 difficulty of the task. Additionally, to better isolate task-related neural activity, successful trials  
415 were defined as trials in which the rat successfully retrieved the pellet on the first attempt. The  
416 accuracies observed were similar to other studies with similar placements of pellets on a  
417 pedestal, increasing the chances of the rat dislodging the pellet off of the shelf, or in which

418 reaching success was scored using the first attempt [3, 22, 23]. Microelectrode implant locations  
419 relative to skull landmarks are shown in Figure 2C. While microelectrodes were implanted  
420 contralateral to the preferred forepaw, microelectrode locations in the left hemisphere were  
421 reflected across the midline so all microelectrode locations could be visualized on the right  
422 hemisphere to allow for comparison across animals. Because we prioritized placing the first  
423 array into RFA given its smaller size, the locations of the RFA arrays were highly consistent  
424 across rats. The increased variability in the location of CFA arrays is due to the geometric  
425 limitations imposed by the craniectomy orientation, patterns of vasculature, and size of the  
426 microelectrode arrays as opposed to variability in the location of CFA across rats. While the  
427 position of the CFA microelectrode arrays varied, the majority of the individual electrode wires  
428 were still within the CFA motor representation.

429 **Table 1. Summary of Task Performance**

| Rat | Preferred Forepaw | Total Sessions | Total Trials | Successful Trials | Percent Accuracy | Exemplar Session Date (Days Post-Implant) | Number of Exemplar Trials | Successful Exemplar Trials | Exemplar Percent Accuracy |
|-----|-------------------|----------------|--------------|-------------------|------------------|-------------------------------------------|---------------------------|----------------------------|---------------------------|
| 1   | Right             | 13             | 371          | 215               | 58.0%            | 25                                        | 36                        | 23                         | 63.9%                     |
| 2   | Right             | 13             | 506          | 332               | 65.6%            | 24                                        | 44                        | 28                         | 63.6%                     |
| 3   | Left              | 16             | 671          | 440               | 65.6%            | 13                                        | 44                        | 32                         | 72.7%                     |
| 4   | Left              | 16             | 648          | 411               | 63.4%            | 20                                        | 45                        | 36                         | 80.0%                     |
| 5   | Left              | 15             | 493          | 320               | 64.9%            | 24                                        | 44                        | 25                         | 56.8%                     |

431 **3.2 Task-Related Neural Activity During ‘Gross’ and ‘Fine’ Reaching Movements**

432 Initially, we sought to characterize the patterns of task-related neural activity observed in  
433 an exemplar recording session. The task-related multi-unit firing activity from several exemplar  
434 channels is shown in Figures 4-6. In the first channel (Figure 4A and C), a statistically significant  
435 increase in firing rate is observed during reaching in both task contexts. Specifically, the peak  
436 multi-unit firing was significantly different from chance when aligned either to the reach to the  
437 lever or the reach towards the pellet, with a stronger modulation observed during the pellet  
438 retrieval. Additionally, when compared to the pre-movement period, there was a weaker but

439 consistent increase in firing rate maintained during the period between the lever press and the  
440 pellet retrieval. While this period was variable in length, the maintained increase in neural  
441 activity is apparent either when aligned to the reach towards the lever or the reach towards the  
442 pellet. In a second exemplar channel (Figure 5A and C) a grasp-related increase in firing rate is  
443 illustrated. In this channel, there was a small but statistically significant increase in firing rate  
444 around the lever press and a larger statistically significant increase in firing rate observed when  
445 aligned to the grasp. While this increase began before the reach towards the pellet, there was a  
446 stronger depth-of-modulation observed when aligning trials to the grasp than when aligning trials  
447 to the reach onset. Finally, other channels showed a more complex response. For example, the  
448 channel shown in Figure 6 displayed a statistically significant decrease in firing rate with a peak  
449 just after the lever press and a statistically significant increase in firing rate immediately before  
450 the reach towards the food pellet.

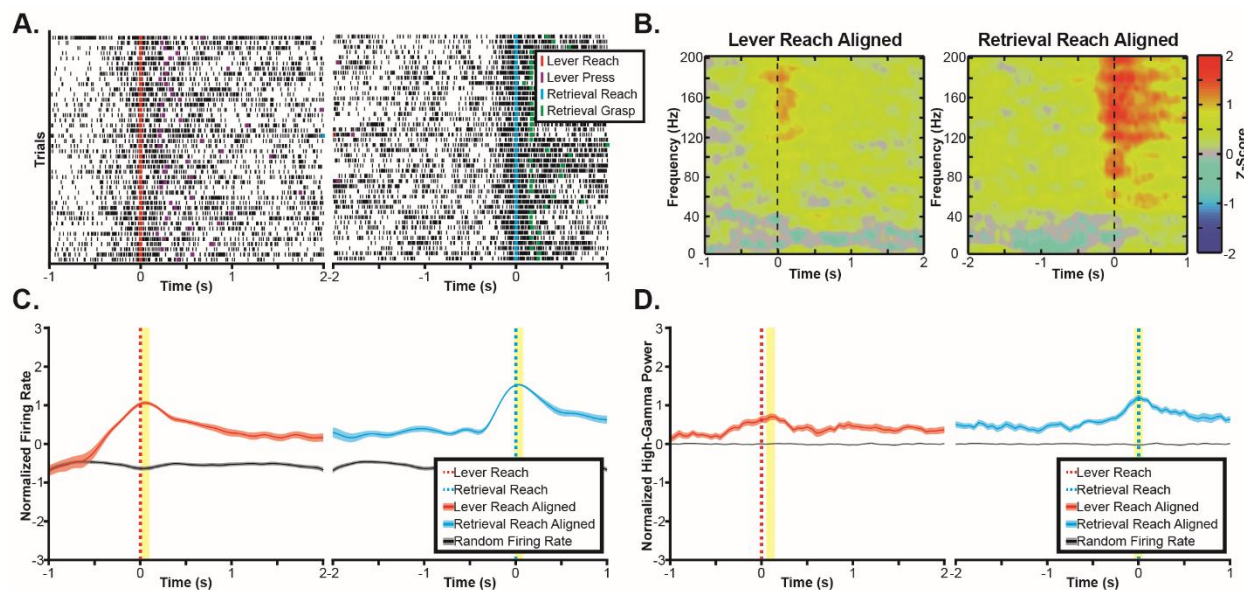

451

452 **Figure 4. Exemplar Reach-Related Channel.** **A.** Raster plots show multi-unit spike times (black ticks)  
453 aligned to the onset of the reaching movement towards the lever (left) and food pellet (right), showing an  
454 increase in firing rate correlated to the reach onset. **B.** Spectral power changes are plotted aligned to the  
455 onset of reaching movements to the lever (left) and pellet (right). Spectral power changes were log  
456 transformed and z-scored relative to randomly selected time windows between trials, therefore, positive

457 values indicate increases in spectral power, and negative values indicate decreases in spectral power. A  
458 broadband increase in spectral power in frequencies above 60Hz was observed for both the reach to the  
459 button and the reach to the pellet. **C.** Multi-unit firing rates were estimated by convolving a Gaussian  
460 waveform with spike times and then averaging firing rates across trials, showing a statistically significant  
461 ( $p < 0.05$ ) increase in firing rate aligned to the onset of the reach in both task components. The statistically  
462 significant peak firing rates are indicated by the yellow highlighting. **D.** High-gamma band (70Hz-110Hz)  
463 power also significantly increased around both the reach to the lever (left) and the reach to the food pellet  
464 (right). The statistically significant peak modulations of high-gamma band spectral power are indicated by  
465 the yellow highlighting.

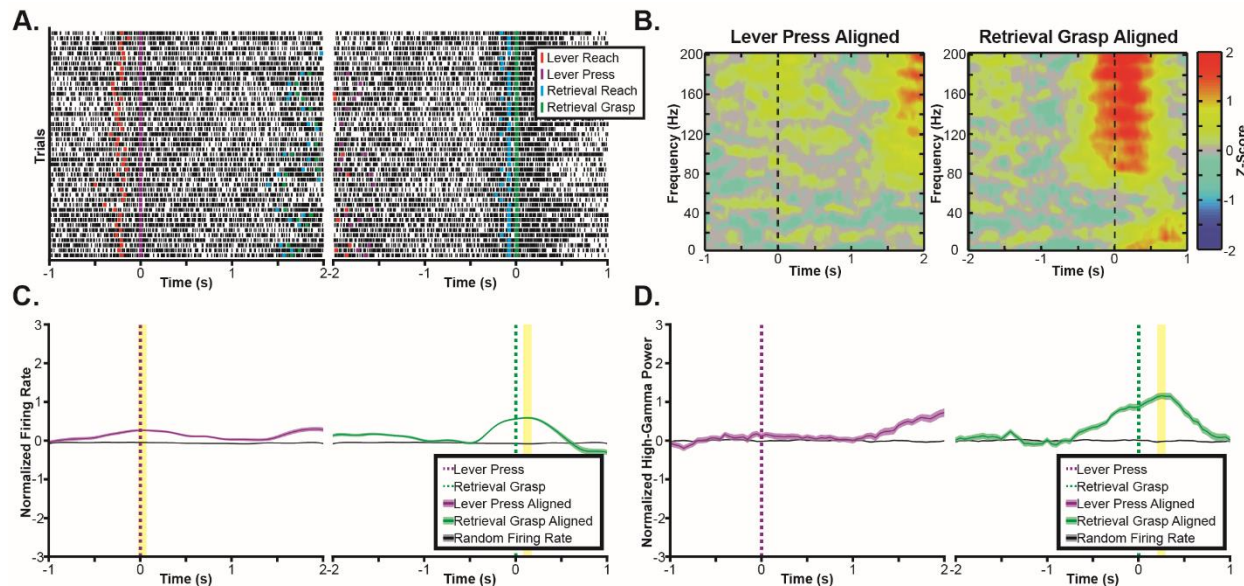

466

467 **Figure 5. Exemplar Grasp-Related Channel.** **A.** Raster plots show multi-unit spike times (black ticks)  
468 aligned to the lever press (left) and onset of the pellet grasp (right), showing an increase in firing rate  
469 correlated to the grasp onset. **B.** Spectral power changes are plotted aligned to the lever press (left) and  
470 pellet grasp (right). Spectral power changes were log transformed and z-scored relative to randomly  
471 selected time windows between trials, therefore, positive values indicated increases in spectral power, and  
472 negative values indicate decreases in spectral power. A broadband increase in spectral power in  
473 frequencies above 60Hz was observed for the pellet grasp. **C.** Multi-unit firing rates were estimated by  
474 convolving a Gaussian waveform with spike times and then averaging across trials. Mean firing rates  
475 synchronized to the grasp were significantly ( $p < 0.05$ ) higher than expected by chance. The statistically  
476 significant peak firing rates are indicated by the yellow highlighting. **D.** High-gamma band (70Hz-110Hz)  
477 power also significantly increased around the pellet grasp (right). The statistically significant peak  
478 modulation of high-gamma band spectral power during the grasp is indicated by the yellow highlighting.

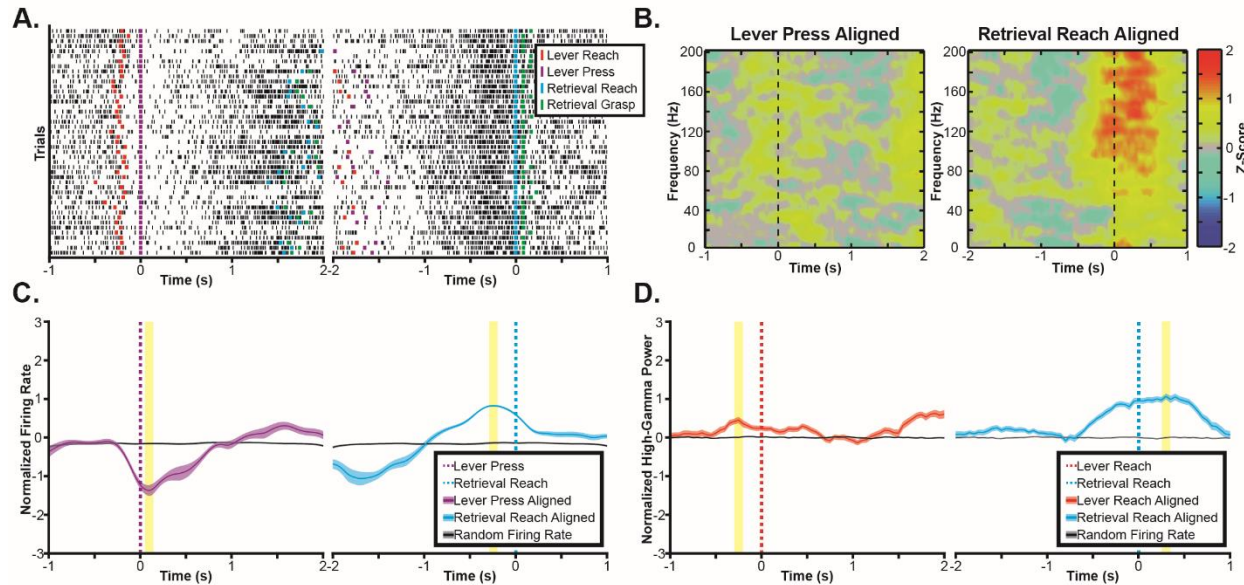

479

480 **Figure 6. Exemplar Pellet-Related Channel.** **A.** Raster plots show multi-unit spike times (black ticks)  
481 aligned to the lever press (left) and onset of the reach to the pellet (right), showing a decrease in firing  
482 rate correlated to the lever press followed by an increase in firing rate prior to the reach to the pellet. **B.**  
483 Spectral power changes are plotted aligned to the reach to the lever (left) and reach to the pellet (right).  
484 Spectral power changes were log transformed and z-scored relative to randomly selected time windows  
485 between trials, therefore, positive values indicated increases in spectral power, and negative values  
486 indicate decreases in spectral power. A broadband increase in spectral power in frequencies above 60Hz  
487 was observed for the reach to the food pellet (right) with a smaller increase in broadband spectral power  
488 observed before the reach to the lever. **C.** Multi-unit firing rates were estimated by convolving a Gaussian  
489 waveform with spike times and then averaging across trials. Mean firing rates show a complex task  
490 response with firing rates significantly ( $p < 0.05$ ) decreased around the lever press and then significantly  
491 ( $p < 0.05$ ) increased immediately prior to the reach to the food pellet. The statistically significant peak  
492 firing rates are indicated by the yellow highlighting. **D.** High-gamma band (70Hz-110Hz) power did not  
493 show a decrease around the lever press but instead showed a small, but statistically significant ( $p < 0.05$ ),  
494 increase in high gamma band power prior to the reach to the lever. The high-gamma band power  
495 maintained the significant increase in activity around the reach to the food pellet observed in the multi-  
496 unit firing rate with an increased duration of activity. The statistically significant peak modulations of  
497 high-gamma band spectral power are indicated by the yellow highlighting.

498

499 Along with modulations of multi-unit firing rate, widespread modulations of the high-  
500 gamma band spectral power were also observed. Figures 4-6 also contain time-frequency plots  
501 showing task-related changes in spectral power throughout the frequency spectrum as well as the  
502 specific change in high-gamma band (70-105Hz) power for the same exemplar channels as the

503 multi-unit firing rate. Across each exemplar, increases in high-gamma band power were  
504 observed in the same channels and task periods where increases in multi-unit firing rate were  
505 observed. Specifically, increases in broadband spectral power were observed when aligned to  
506 both the reach to the lever and reach to the pellet in the channel shown in Figure 4, for the grasp  
507 but not the lever press in the exemplar channel shown in Figure 5, and for the reach to the pellet  
508 in Figure 6. While increases in multi-unit firing rate and high gamma band power were often  
509 observed in the same channel, the high gamma band did not exhibit task-related decreases. In the  
510 exemplar channel shown in Figure 6, firing rate decreased around the lever press, while a small  
511 but statistically significant increase in high-gamma band spectral power was observed. The time  
512 scales of changes in high-gamma band spectral power were also often extended relative to multi-  
513 unit firing rate. This longer modulation of activity is particularly apparent for the pellet retrieval  
514 in Figure 5 (grasp) and Figure 6 (reach to the pellet).

515         The range of task-related activations observed was characterized across all channels and  
516 all animals. The topography of microelectrodes classified as related to each task component is  
517 shown in Figure 7. The proportion of channels classified as related to each task component are  
518 summarized for multi-unit firing rate changes in Table 2. Of the 118 channels with at least one  
519 spike profile found, 98 channels had statistically significant task-related changes in multi-unit  
520 firing rate. While more channels had firing-rate changes during the pellet retrieval than the lever  
521 press, more channels were classified as reach-related than were classified as lever press-related  
522 or grasp-related. For the pellet retrieval this difference in the number of reach-related and grasp-  
523 related channels appears to stem from RFA, where almost three times more channels were  
524 classified as reach-related than were classified as grasp-related. The proportion of channels  
525 classified as related to each task component using high-gamma band power changes are shown in



526 Table 3. Because LFP power changes can be detected in the absence of spike profiles, more  
 527 channels had statistically significant changes in high gamma band power than had changes in  
 528 multi-unit firing rate. For lever press high-gamma band power changes, the vast majority of  
 529 channels were classified as reach-related, with a smaller number classified as lever press-related.  
 530 Classification using high-gamma band spectral power was similar to the classification using  
 531 multi-unit firing activity for the lever press. However, this classification differed for pellet  
 532 retrieval. When classified based upon the changes in high-gamma band spectral power, the  
 533 proportion of reach and grasp-related channels were similar, with a slightly higher number of  
 534 reach-related than grasp-related channels in RFA.

535 **Table 2. Summary of significant task-related changes in multi-unit firing rate**

| Area         | Total Channels | Channels with Spikes | Button Press |           |           |            |            | Retrieval  |           |            |           |            | Any Activation |
|--------------|----------------|----------------------|--------------|-----------|-----------|------------|------------|------------|-----------|------------|-----------|------------|----------------|
|              |                |                      | Reach        |           | Press     |            | Total      | Reach      |           | Grasp      |           | Total      |                |
|              |                |                      | Increases    | Decreases | Increases | Decreases  |            | Increases  | Decreases | Increases  | Decreases |            |                |
| RFA          | 76             | 60 (79.0%)           | 32 (42.1%)   | 2 (2.6%)  | 5 (6.6%)  | 10 (13.2%) | 49 (64.5%) | 37 (48.9%) | 4 (5.3%)  | 12 (15.8%) | 4 (5.3%)  | 57 (75.0%) | 59 (77.6%)     |
| CFA          | 79             | 58 (73.4%)           | 15 (19.0%)   | 1 (1.3%)  | 7 (8.9%)  | 4 (5.1%)   | 27 (34.2%) | 20 (25.3%) | 1 (1.3%)  | 12 (15.2%) | 1 (1.3%)  | 34 (43.0%) | 39 (49.4%)     |
| <b>Total</b> | 155            | 118 (76.1%)          | 47 (30.3%)   | 3 (1.9%)  | 12 (7.7%) | 14 (9.0%)  | 76 (49.0%) | 57 (36.8%) | 5 (3.2%)  | 24 (15.5%) | 5 (3.2%)  | 91 (58.7%) | 98 (63.2%)     |

536  
537

538 **Table 3. Summary of significant task-related changes in high-gamma band (70-110Hz) power**

| Area         | Total Channels | Button Press |            |             | Retrieval  |            |             | Any Task Modulation |
|--------------|----------------|--------------|------------|-------------|------------|------------|-------------|---------------------|
|              |                | Reach        | Press      | Total       | Reach      | Grasp      | Total       |                     |
| RFA          | 78             | 53 (68.0%)   | 8 (10.3%)  | 61 (78.2%)  | 41 (52.6%) | 37 (47.4%) | 78 (100%)   | 78 (100%)           |
| CFA          | 79             | 50 (63.3%)   | 12 (15.2%) | 62 (78.5%)  | 33 (41.8%) | 39 (49.4%) | 72 (91.1%)  | 73 (92.4%)          |
| <b>Total</b> | 157            | 103 (65.6%)  | 20 (12.7%) | 123 (78.3%) | 74 (47.1%) | 76 (48.4%) | 150 (95.5%) | 151 (96.2%)         |

539

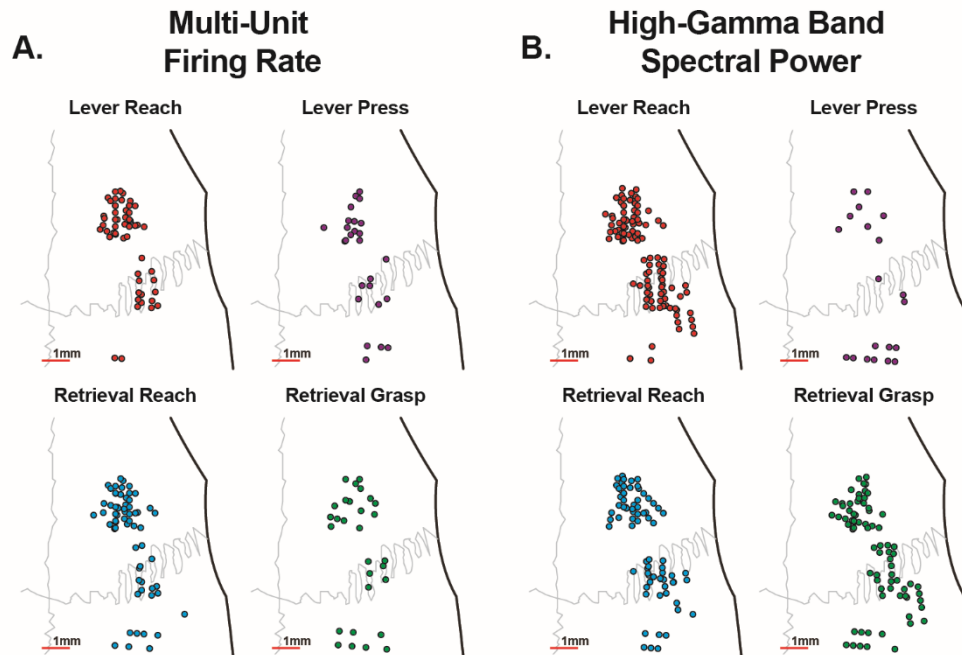

540

541 **Figure 7. Microelectrode Classification.** Each microelectrode was classified based upon whether it was  
542 significantly modulated by the reach to the lever, the lever press, or not modulated during the lever press.  
543 Similarly, each electrode was also classified as modulated when aligned to the reach to the food pellet,  
544 when aligned to the grasp of the pellet, or not modulated during the retrieval. Each classification was  
545 made using both the multi-unit firing rate (A) and high-gamma band (70-110Hz) spectral power (B).  
546 When examining changes in multi-unit firing rate, more channels were modulated by the reaching  
547 movements than either the lever press or grasping movements. Additionally, more of the channels  
548 modulated by reaching movements were located in RFA than in CFA. When examining changes in high-  
549 gamma band power, while more channels were modulated by the reach than the button press, because of  
550 the decrease in temporal specificity, a similar number of channels were modulated by both the reach and  
551 the grasp. In contrast to the multi-unit firing rate, similar numbers of electrodes with significant task-  
552 related activations aligned to the reach were found in both CFA and RFA.

### 553 **3.3 Consistency of Rodent Task-Related Neural Activity**

554 In addition to characterizing the task-related activations observed in RFA and CFA, we  
555 investigated whether task-related activations in RFA and CFA were stable over several weeks.  
556 The task-related multi-unit firing and spectral power changes for an exemplar channel are shown  
557 for several recording sessions in Figure 8. On each recording day, an increase in multi-unit firing  
558 rate was observed around the reach towards the pellet. Because the background firing rate  
559 differed across days, the depth-of-modulation was variable across days. In contrast, a similar

560 broadband increase in high-gamma band power was observed for each session with a similar  
561 depth-of-modulation observed in each day shown.

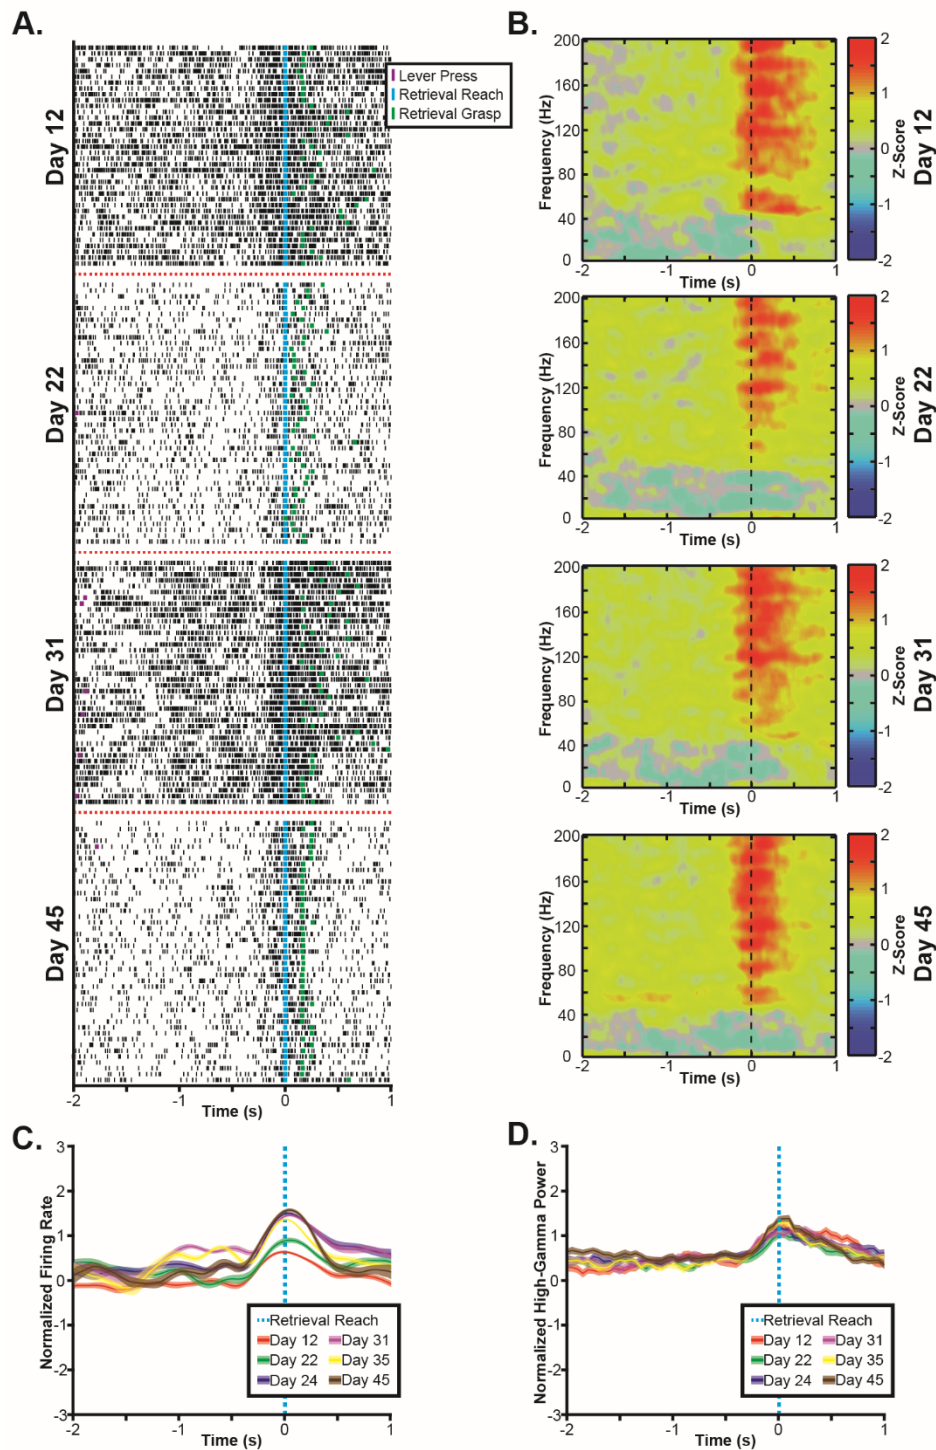

562

563 **Figure 8. Exemplar task-related activity across recording days. A.** Raster plots show multi-unit spike  
564 times (black ticks) aligned to the onset of the reaching movement towards the food pellet on several

565 recording days, showing an increase in firing rate correlated to the reach onset that is conserved across  
566 days. **B.** Spectral power changes are plotted aligned to the onset of reaching movements to the pellet on  
567 the same days. Spectral power changes were log transformed and z-scored relative to randomly selected  
568 time windows between trials, therefore, positive values indicate increases in spectral power, and negative  
569 values indicate decreases in spectral power. A broadband increase in spectral power in frequencies above  
570 60Hz is observed aligned to the reach in each day. **C.** Multi-unit firing rates were estimated by  
571 convolving a Gaussian waveform with spike times and then averaging firing rates across trials, showing a  
572 statistically significant ( $p < 0.05$ ) increase in firing rate aligned to the onset of the reach. While the timing  
573 of this increase in firing rate is conserved across days, there is some variance in the depth-of-modulation  
574 observed. **D.** High-gamma band (70Hz-110Hz) power also significantly increased around the reach to the  
575 food pellet with similar depth-of-modulations observed on each recording day. All plots were generated  
576 from the same exemplar channel within RFA of a single animal.

577           The stability of task-related neural activity was quantified by calculating the correlation  
578 between the daily and overall average modulation for each channel with a significant task-related  
579 modulation in the exemplar recording session. These correlations are shown for each rat in  
580 Figure 9 and summarized in Table 4. The task-related neural activity was largely stable for each  
581 rat, decreasing only when recording quality becomes impaired, such as in Rat 1 starting around  
582 day 70 post-implant and in Rat 2 starting around 40 days post-implant. While both multi-unit  
583 firing rate changes and high-gamma band power changes were stable over time, daily task-  
584 related changes in high-gamma band power were more correlated to the overall average task-  
585 related changes in high-gamma band power than multi-unit firing rates were. Specifically, the  
586 distribution of correlations between daily and overall task-related modulations was significantly  
587 higher for high-gamma band spectral power changes than for multi-unit firing rate changes  
588 (Wilcoxon rank sum test,  $p = 4.04 \times 10^{-44}$ ).

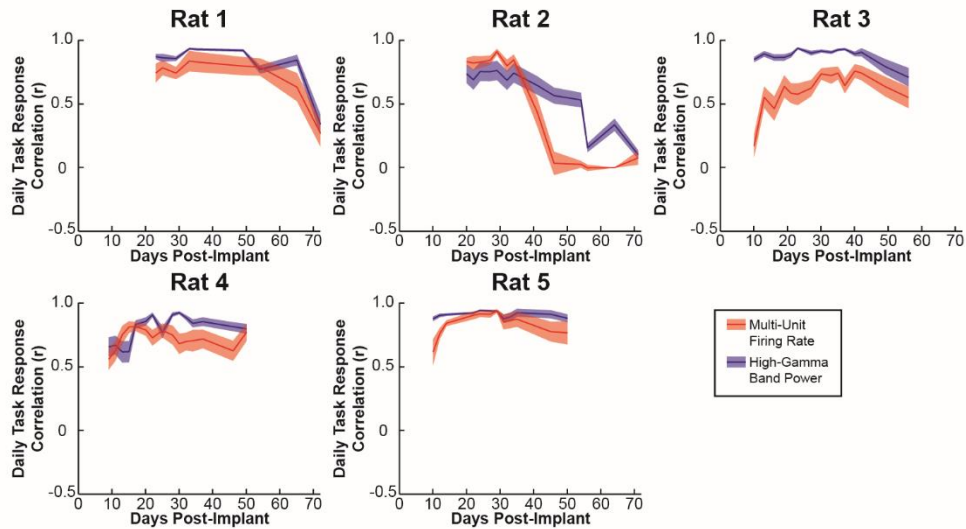

589

590 **Figure 9. Cross-Day Stability.** The stability of task-related changes in neural activity was examined by  
 591 determining the correlation between the daily mean firing rate and the overall mean firing rate as well as  
 592 the correlation between the daily high-gamma band power change and the overall mean high-gamma band  
 593 power change for each channel. Plots show the mean daily correlation across channels and the error bars  
 594 show the standard error. While a decrease in signal quality was observed at 9 weeks and 5 weeks in rats 1  
 595 and 2 respectively, overall, task-related changes in multi-unit activity and high-gamma band power were  
 596 stable across days for each rat. While changes in multi-unit firing rate and high-gamma band power were  
 597 both stable across recording days, the task-related the high-gamma band power change had higher  
 598 correlations between the daily and overall mean than was observed for task-related multi-unit firing rate  
 599 changes. Additionally, high-gamma band power changes show a slower decrease in stability from the  
 600 degradation in signal quality observed in rats 1 and 2.

601 **Table 4. Summary of the stability of task-related changes in multi-unit firing rate and high-gamma**  
 602 **band power.**

| Rat          | Multi-Unit Firing |                            | High-Gamma Band Spectral Power |                            |
|--------------|-------------------|----------------------------|--------------------------------|----------------------------|
|              | Channels (n)      | Mean Daily Correlation (r) | Channels (n)                   | Mean Daily Correlation (r) |
| 1            | 14                | 0.714                      | 31                             | 0.814                      |
| 2            | 15                | 0.496                      | 26                             | 0.574                      |
| 3            | 21                | 0.610                      | 30                             | 0.878                      |
| 4            | 21                | 0.721                      | 30                             | 0.797                      |
| 5            | 16                | 0.835                      | 31                             | 0.910                      |
| <b>Total</b> | <b>87</b>         | <b>0.670</b>               | <b>148</b>                     | <b>0.801</b>               |

603

#### 604 4. Discussion

605 This study used a novel automated behavior box to demonstrate the widespread nature of

606 reach and grasp-related neural activity in the rat primary motor cortex (CFA) and premotor

607 cortex (RFA). Previous studies have demonstrated task-related modulation of activity during  
608 reaching tasks including center-out movements of a lever, push/pull movements of a lever, and  
609 pellet retrieval tasks [1, 7, 11, 24-26]. Importantly, these previous studies found that neural  
610 activity could be used to decode movement parameters, such as kinematics and kinetics [11, 25].  
611 Here we examined the neural correlates of reaching movements using a novel automated  
612 behavior box that combined a gross reaching task (lever press) and a fine reaching task (skilled  
613 pellet retrieval) in close temporal succession. While previous examples of automated rodent  
614 behavior boxes have been described, our system adds the ability to examine two similar but  
615 distinct and relatively unconstrained reaching tasks in the same animals [22, 23, 27]. As with  
616 these previous systems, the use of an automated system reduces the level of supervision  
617 necessary to train rodents to perform reaching movements and eliminates many potential biases  
618 inherent in manually administered tasks.

619         Interestingly, a greater number of channels were active during the skilled pellet retrieval  
620 than during the lever press, potentially indicating greater cortical involvement in planning and  
621 executing the pellet retrieval than the lever press. This increased activity during the pellet  
622 retrieval is reasonable when considering that this task component is more complex and involves  
623 increased use of the distal forelimb muscles. Therefore, the increased task-related neural activity  
624 during the pellet retrieval may represent specific or increased activation of neurons during distal  
625 movements as has been observed in premotor areas of non-human primates during tasks  
626 requiring distal forelimb movements [28, 29]. Additionally, while the lever press is indirectly  
627 associated with the food reward, the pellet retrieval is directly associated with the reward. As  
628 RFA has been shown to encode an expectation of reward [26], some of the observed increases in  
629 activity may be associated with the direct expectation of the food reward.

630           The combination of gross and fine reaching movements into a single behavioral task  
631 provides a new tool to examine the neural basis of reaching and grasping in rodents. Previous  
632 studies have argued for a specific role for RFA in grasping based upon the patterns of  
633 movements elicited by long-train ICMS [30]. However, lesion studies have produced conflicting  
634 results with some studies showing deficits in reach-to-grasp tasks after a lesion to CFA [10, 17]  
635 while other studies have found grasp-specific deficits isolated to lesions of RFA and not CFA  
636 when temporary lesions were induced with cortical cooling [30]. Isolating the specific  
637 differences in the roles that RFA and CFA play in controlling reaching and grasping is  
638 complicated by the fact that both regions exhibit extensive task-related neural activity during  
639 reach-to-grasp tasks [7] that are likely affected in part by the complex interactions between the  
640 two regions [15]. Our data have found that task-related activity in RFA was most modulated  
641 when aligned to the onset of reaching movements, however this may be due to a role of RFA in  
642 planning the combined reach-to-grasp movement as opposed to a specific role of RFA in  
643 reaching as opposed to grasping.

644           Because rodents have both primary and secondary forelimb motor regions, a number of  
645 studies have utilized rodent models of stroke and traumatic brain injury to examine the role of  
646 neuroplasticity in motor recovery [9, 10, 17]. In particular, ICMS mapping studies have found  
647 that expansions of RFA are associated with recovery of function following a lesion to CFA [10].  
648 While rodents can learn to modulate activity in the perilesional cortex [6], the specific  
649 relationship between functional changes in perilesional cortex and secondary motor regions is  
650 unknown. The combined behavioral task demonstrated here is particularly relevant for  
651 examining the changes in task-related neural activity associated with post-injury neuroplasticity.  
652 While the lever press requires only a gross reaching movement, the pellet retrieval has the

653 additional requirements of fine control of the distal forepaw and increased integration of sensory  
654 and motor information to successfully grasp and retrieve the pellet. Furthermore, the lever press  
655 task is more likely to be successfully completed in the early period of motor recovery which will  
656 allow for the assessment of the contribution of neuroplasticity to changes in task-related neural  
657 responses during the subacute period when the level of motor recovery is insufficient to allow for  
658 successful performance on the single-pellet retrieval task [9, 18].

659         Importantly, the task-related changes in neural activity were stable in individual channels  
660 over the 7-10 week period examined. While both task-related multi-unit firing and high-gamma  
661 band power changes persist over this period, the LFP high-gamma band showed more  
662 consistency across days. This increased stability is likely due to the difficulty in isolating the  
663 same individual neurons across days and the increased susceptibility of multi-unit firing rates to  
664 noise in the recordings. Previous studies examining chronic recordings in humans and non-  
665 human primates have observed that less than 40% of single-units were stable through a period of  
666 15 days [31]. Additionally, changes in firing rate and spike amplitude are even seen within single  
667 recording days [32]. The finding that reaching related neural activity in RFA and CFA is stable  
668 over several weeks has particularly important implications for examining the role of  
669 neuroplasticity in recovery from a focal cortical lesion. Specifically, while multi-unit firing may  
670 be used to compare the proportion of channels with firing rate changes aligned to specific  
671 components of the task with greater temporal precision, LFP signals may be more valuable for  
672 examining changes in the relative strength of activations across days in single channels.

## 673 **5. Conclusions**

674         Collectively, we have demonstrated a novel complex rodent reaching task incorporating a  
675 gross lever press with a fine pellet retrieval into a single trial. Importantly, there were widespread



676 task-related changes in neural activity during both task periods from microelectrodes in RFA and  
677 CFA, demonstrating a significant cortical involvement in both reaching tasks. Furthermore, this  
678 cortical involvement is maintained over months with stable task-related changes in neural  
679 activity observed at the level of single channels. These results serve to further characterize the  
680 normal role of rodent primary and secondary motor areas in planning and executing forelimb  
681 movements and further establish the rat as a model species for future studies examining the  
682 changes in the specific relationship between neural activity and forelimb movements associated  
683 with neuroplasticity following manipulation to the rodent sensorimotor system.

684

#### 685 **Author Contributions**

686 Conceived and designed the experiments: DTB DJG RJN; Performed the experiments: DTB DJG  
687 MDM; Analyzed the data: DTB; Contributed analysis tools: MDM; Wrote the paper: DTB RJN

688

#### 689 **Acknowledgments**

690 We would like to thank Mairaj Sami and Daniel Rittle for assistance with rodent behavioral  
691 training. Funding for this work was provided by the National Institutes of Health: NIH Grant  
692 R01NS030853, NIH Grant F32NS100339, and NIH Grant T32HD057850.

#### 693 **Competing Interests**

694 The authors have no relevant financial conflicts of interest related to this work.

#### 695 **Data Availability**

696 The data underlying the findings reported in this manuscript have been deposited in an online  
697 Open Science Framework repository that will be made public at the time of publication in  
698 accordance with the journal Data Availability Policy.

699

700 **References**

- 701 1. Igarashi J, Isomura Y, Arai K, Harukuni R, Fukai T. A theta-gamma oscillation code for  
702 neuronal coordination during motor behavior. *J Neurosci.* 2013;33(47):18515-30. doi:  
703 10.1523/JNEUROSCI.2126-13.2013. PubMed PMID: 24259574.
- 704 2. Slutzky MW, Jordan LR, Bauman MJ, Miller LE. A new rodent behavioral paradigm for  
705 studying forelimb movement. *J Neurosci Methods.* 2010;192(2):228-32. Epub 2010/08/10. doi:  
706 10.1016/j.jneumeth.2010.07.040. PubMed PMID: 20691727; PubMed Central PMCID:  
707 PMC2943042.
- 708 3. Hermer-Vazquez L, Hermer-Vazquez R, Chapin JK. The reach-to-grasp-food task for  
709 rats: a rare case of modularity in animal behavior? *Behav Brain Res.* 2007;177(2):322-8. doi:  
710 10.1016/j.bbr.2006.11.029. PubMed PMID: 17207541; PubMed Central PMCID:  
711 PMC1885543.
- 712 4. Whishaw IQ, Pellis SM. The structure of skilled forelimb reaching in the rat: a  
713 proximally driven movement with a single distal rotatory component. *Behav Brain Res.*  
714 1990;41(1):49-59. Epub 1990/12/07. PubMed PMID: 2073355.
- 715 5. Chapin JK, Moxon KA, Markowitz RS, Nicolelis MA. Real-time control of a robot arm  
716 using simultaneously recorded neurons in the motor cortex. *Nat Neurosci.* 1999;2(7):664-70. doi:  
717 10.1038/10223. PubMed PMID: 10404201.
- 718 6. Gulati T, Won SJ, Ramanathan DS, Wong CC, Bodepudi A, Swanson RA, et al. Robust  
719 neuroprosthetic control from the stroke perilesional cortex. *J Neurosci.* 2015;35(22):8653-61.  
720 doi: 10.1523/JNEUROSCI.5007-14.2015. PubMed PMID: 26041930.

- 721 7. Hyland B. Neural activity related to reaching and grasping in rostral and caudal regions  
722 of rat motor cortex. *Behav Brain Res.* 1998;94(2):255-69. PubMed PMID: 9722277.
- 723 8. Laubach M, Wessberg J, Nicolelis MA. Cortical ensemble activity increasingly predicts  
724 behaviour outcomes during learning of a motor task. *Nature.* 2000;405(6786):567-71. doi:  
725 10.1038/35014604. PubMed PMID: 10850715.
- 726 9. Nishibe M, Barbay S, Guggenmos D, Nudo RJ. Reorganization of motor cortex after  
727 controlled cortical impact in rats and implications for functional recovery. *J Neurotrauma.*  
728 2010;27(12):2221-32. doi: 10.1089/neu.2010.1456. PubMed PMID: 20873958; PubMed Central  
729 PMCID: PMCPMC2996815.
- 730 10. Nishibe M, Urban ET, 3rd, Barbay S, Nudo RJ. Rehabilitative training promotes rapid  
731 motor recovery but delayed motor map reorganization in a rat cortical ischemic infarct model.  
732 *Neurorehabil Neural Repair.* 2015;29(5):472-82. doi: 10.1177/1545968314543499. PubMed  
733 PMID: 25055836; PubMed Central PMCID: PMCPMC4303553.
- 734 11. Slutzky MW, Jordan LR, Lindberg EW, Lindsay KE, Miller LE. Decoding the rat  
735 forelimb movement direction from epidural and intracortical field potentials. *J Neural Eng.*  
736 2011;8(3):036013. doi: 10.1088/1741-2560/8/3/036013. PubMed PMID: 21508491; PubMed  
737 Central PMCID: PMCPMC3124348.
- 738 12. Neafsey EJ, Sievert C. A second forelimb motor area exists in rat frontal cortex. *Brain*  
739 *Res.* 1982;232(1):151-6. Epub 1982/01/28. PubMed PMID: 7055691.
- 740 13. Rouiller EM, Moret V, Liang F. Comparison of the connectional properties of the two  
741 forelimb areas of the rat sensorimotor cortex: support for the presence of a premotor or  
742 supplementary motor cortical area. *Somatosens Mot Res.* 1993;10(3):269-89. Epub 1993/01/01.  
743 PubMed PMID: 8237215.

- 744 14. Sievert CF, Neafsey EJ. A chronic unit study of the sensory properties of neurons in the  
745 forelimb areas of rat sensorimotor cortex. *Brain Res.* 1986;381(1):15-23. Epub 1986/08/27.  
746 PubMed PMID: 3530375.
- 747 15. Deffeyes JE, Touvykine B, Quessy S, Dancause N. Interactions between rostral and  
748 caudal cortical motor areas in the rat. *J Neurophysiol.* 2015;113(10):3893-904. doi:  
749 10.1152/jn.00760.2014. PubMed PMID: 25855697; PubMed Central PMCID:  
750 PMC4480625.
- 751 16. Whishaw IQ, Alaverdashvili M, Kolb B. The problem of relating plasticity and skilled  
752 reaching after motor cortex stroke in the rat. *Behav Brain Res.* 2008;192(1):124-36. doi:  
753 10.1016/j.bbr.2007.12.026. PubMed PMID: 18282620.
- 754 17. Whishaw IQ, Pellis SM, Gorny BP, Pellis VC. The impairments in reaching and the  
755 movements of compensation in rats with motor cortex lesions: an endpoint, videorecording, and  
756 movement notation analysis. *Behav Brain Res.* 1991;42(1):77-91. PubMed PMID: 2029348.
- 757 18. Guggenmos DJ, Azin M, Barbay S, Mahnken JD, Dunham C, Mohseni P, et al.  
758 Restoration of function after brain damage using a neural prosthesis. *Proc Natl Acad Sci U S A.*  
759 2013;110(52):21177-82. doi: 10.1073/pnas.1316885110. PubMed PMID: 24324155; PubMed  
760 Central PMCID: PMC3876197.
- 761 19. Quiroga RQ, Nadasdy Z, Ben-Shaul Y. Unsupervised spike detection and sorting with  
762 wavelets and superparamagnetic clustering. *Neural Comput.* 2004;16(8):1661-87. Epub  
763 2004/07/02. doi: 10.1162/089976604774201631. PubMed PMID: 15228749.
- 764 20. Marple Jr SL, Carey WM. *Digital spectral analysis with applications.* ASA; 1989.

- 765 21. Rasch MJ, Gretton A, Murayama Y, Maass W, Logothetis NK. Inferring spike trains  
766 from local field potentials. *J Neurophysiol.* 2008;99(3):1461-76. doi: 10.1152/jn.00919.2007.  
767 PubMed PMID: 18160425.
- 768 22. Ellens DJ, Gaidica M, Toader A, Peng S, Shue S, John T, et al. An automated rat single  
769 pellet reaching system with high-speed video capture. *J Neurosci Methods.* 2016;271:119-27.  
770 doi: 10.1016/j.jneumeth.2016.07.009. PubMed PMID: 27450925; PubMed Central PMCID:  
771 PMC5003677.
- 772 23. Wong CC, Ramanathan DS, Gulati T, Won SJ, Ganguly K. An automated behavioral box  
773 to assess forelimb function in rats. *J Neurosci Methods.* 2015;246:30-7. Epub 2015/03/15. doi:  
774 10.1016/j.jneumeth.2015.03.008. PubMed PMID: 25769277; PubMed Central PMCID:  
775 PMC5472046.
- 776 24. Jensen W, Rousche PJ. Encoding of self-paced, repetitive forelimb movements in rat  
777 primary motor cortex. *Conf Proc IEEE Eng Med Biol Soc.* 2004;6:4233-6. doi:  
778 10.1109/IEMBS.2004.1404180. PubMed PMID: 17271238.
- 779 25. Khorasani A, Heydari Beni N, Shalchyan V, Daliri MR. Continuous Force Decoding  
780 from Local Field Potentials of the Primary Motor Cortex in Freely Moving Rats. *Sci Rep.*  
781 2016;6:35238. Epub 2016/10/22. doi: 10.1038/srep35238. PubMed PMID: 27767063; PubMed  
782 Central PMCID: PMC5073334.
- 783 26. Saiki A, Kimura R, Samura T, Fujiwara-Tsukamoto Y, Sakai Y, Isomura Y. Different  
784 modulation of common motor information in rat primary and secondary motor cortices. *PLoS*  
785 *One.* 2014;9(6):e98662. doi: 10.1371/journal.pone.0098662. PubMed PMID: 24893154;  
786 PubMed Central PMCID: PMC4043846.

- 787 27. Poddar R, Kawai R, Olveczky BP. A fully automated high-throughput training system for  
788 rodents. *PLoS One*. 2013;8(12):e83171. doi: 10.1371/journal.pone.0083171. PubMed PMID:  
789 24349451; PubMed Central PMCID: PMC3857823.
- 790 28. Kurata K, Tanji J. Premotor cortex neurons in macaques: activity before distal and  
791 proximal forelimb movements. *J Neurosci*. 1986;6(2):403-11. Epub 1986/02/01. PubMed PMID:  
792 3950703.
- 793 29. Rizzolatti G, Camarda R, Fogassi L, Gentilucci M, Luppino G, Matelli M. Functional  
794 organization of inferior area 6 in the macaque monkey. II. Area F5 and the control of distal  
795 movements. *Exp Brain Res*. 1988;71(3):491-507. Epub 1988/01/01. PubMed PMID: 3416965.
- 796 30. Brown AR, Teskey GC. Motor cortex is functionally organized as a set of spatially  
797 distinct representations for complex movements. *J Neurosci*. 2014;34(41):13574-85. doi:  
798 10.1523/JNEUROSCI.2500-14.2014. PubMed PMID: 25297087.
- 799 31. Dickey AS, Suminski A, Amit Y, Hatsopoulos NG. Single-unit stability using chronically  
800 implanted multielectrode arrays. *J Neurophysiol*. 2009;102(2):1331-9. doi:  
801 10.1152/jn.90920.2008. PubMed PMID: 19535480; PubMed Central PMCID:  
802 PMC32724357.
- 803 32. Perge JA, Homer ML, Malik WQ, Cash S, Eskandar E, Friehs G, et al. Intra-day signal  
804 instabilities affect decoding performance in an intracortical neural interface system. *J Neural*  
805 *Eng*. 2013;10(3):036004. doi: 10.1088/1741-2560/10/3/036004. PubMed PMID: 23574741;  
806 PubMed Central PMCID: PMC3693851.
